# Supplementary material for: Women’s Labour Market Attachment and the Gender Wealth Gap
Source: publisher site journal article supplement (doi:10.1515/bejeap-2023-0259), 2024-07-16
Supplement: Supplementary file 1 [file j_bejeap-2023-0259_suppl_001.docx]

**Women’s labour market attachment and the gender wealth gap**

**APPENDICES**

**APPENDIX A**

**Additional Tables**

Table A1. Selected information about labor market, GDP, house price and mortgage loan rate 2002 - 2012

|  | 2002 | 2003 | 2004 | 2005 | 2006 | 2007 | 2008 | 2009 | 2010 | 2011 | 2012 |
| --- | --- | --- | --- | --- | --- | --- | --- | --- | --- | --- | --- |
| Labor force participation rate of 15-65 years old (%) | 65.4 | 64.9 | 64.3 | 65.4 | 67.1 | 68.9 | 70.0 | 70.2 | 71.0 | 72.5 | 72.8 |
| - Men | 71.9 | 70.9 | 70.1 | 71.2 | 72.7 | 74.5 | 75.7 | 75.3 | 75.9 | 77.3 | 77.6 |
| - Women | 58.8 | 58.8 | 58.4 | 59.5 | 61.4 | 63.1 | 64.2 | 65.1 | 66.0 | 67.7 | 68.0 |
| Employees working fulltime (%) | 78.6 | 77.6 | 77.2 | 75.5 | 73.8 | 73.7 | 73.7 | 73.5 | 73.3 | 72.8 | 72.8 |
| - Men | 94.5 | 94.0 | 93.8 | 92.6 | 91.2 | 91.1 | 91.0 | 90.8 | 90.7 | 90.4 | 90.2 |
| - Women | 59.8 | 58.6 | 57.9 | 55.7 | 54.0 | 53.8 | 54.0 | 54.2 | 54.1 | 53.7 | 53.9 |
| Employees working part time (%) | 21.4 | 22.4 | 22.8 | 24.5 | 26.2 | 26.3 | 26.3 | 26.5 | 26.7 | 27.2 | 27.2 |
| - Men | 5.5 | 6.0 | 6.2 | 7.4 | 8.8 | 8.9 | 9.0 | 9.2 | 9.3 | 9.6 | 9.8 |
| - Women | 40.2 | 41.4 | 42.1 | 44.3 | 46.0 | 46.2 | 46.0 | 45.8 | 45.9 | 46.3 | 46.1 |
| Unemployment rate (%) | 9.8 | 10.5 | 10.5 | 11.7 | 11.0 | 9.0 | 7.8 | 8.1 | 7.7 | 7.1 | 6.8 |
| - Men | 9.9 | 10.9 | 11.0 | 11.7 | 10.5 | 8.5 | 7.4 | 8.3 | 7.9 | 7.1 | 6.9 |
| - Women | 9.5 | 10.0 | 10.1 | 11.8 | 11.0 | 9.6 | 8.2 | 7.9 | 7.5 | 7.0 | 6.8 |
| Change in gross monthly salary (%)* | n.a. | 3.1 | 2.2 | 1.9 | 1.8 | 1.9 | 3.1 | 0.7 | 2.5 | 3.2 | 3.1 |
| - Men | n.a. | 2.9 | 2.1 | 1.8 | 1.6 | 6.6 | 3.0 | 0.1 | 2.7 | 3.3 | 2.9 |
| - Women | n.a. | 3.2 | 2.6 | 2.3 | 1.9 | 1.3 | 3.4 | 2.3 | 2.4 | 3.0 | 3.2 |
| Change in CPI (%) | 1.3 | 1.1 | 1.7 | 1.5 | 1.6 | 2.3 | 2.6 | 0.3 | 1.1 | 2.1 | 2.0 |
| Change of real GDP (%) | -0.2 | -0.7 | 1.2 | 0.7 | 3.8 | 3.0 | 1.0 | -5.7 | 4.2 | 3.9 | 0.4 |
| House price index (2015=100) | 83.3 | 83.6 | 82.3 | 83.5 | 83.0 | 81.2 | 82.3 | 83.0 | 83.9 | 86.8 | 89.8 |
| Mortgage loan rate  with 10-year fixed interest rate | 5.4 | 5.2 | 4.4 | 4.1 | 4.6 | 5.2 | 4.6 | 4.4 | 4.0 | 3.3 | 2.7 |

Source. Federal statistical office; mortgage loan rate: Statista (2021).

* Since 2007 including Service sector; n.a. not available

Table A.2 Determinants of wealth for overall population aged 25-64, by gender. Long regressions

| *y = IHS wealth* | Men 2007 | Men 2012 | Women 2007 | Women 2012 |
| --- | --- | --- | --- | --- |
| Age | 0.04 | -0.10 | 0.10 | 0.12 |
|  | (0.07) | (0.08) | (0.06) | (0.08) |
| Age squared | 0.00 | 0.00+ | -0.00 | -0.00 |
|  | (0.00) | (0.00) | (0.00) | (0.00) |
| Number of children | -0.40+ | -0.15 | -0.64** | -0.58* |
|  | (0.23) | (0.27) | (0.20) | (0.24) |
| Lagged lower voc. education | 0.16 | 1.08*** | 0.95*** | 0.53* |
|  | (0.24) | (0.30) | (0.20) | (0.25) |
| Lagged upper voc. education | 0.37 | 1.40*** | 1.01*** | 0.55+ |
|  | (0.30) | (0.36) | (0.25) | (0.31) |
| Lagged university degree | 0.18 | 1.49*** | 1.36*** | 1.24*** |
|  | (0.30) | (0.36) | (0.25) | (0.30) |
| East Germany | -0.20 | -0.59** | -0.14 | -0.38* |
|  | (0.18) | (0.20) | (0.17) | (0.19) |
| Migrant | -0.89*** | -0.76** | -0.74*** | -0.41+ |
|  | (0.22) | (0.26) | (0.19) | (0.23) |
| Full time employment (months) | 0.03*** | 0.03*** | 0.02** | 0.01 |
|  | (0.01) | (0.01) | (0.01) | (0.01) |
| Part time employment (months) | 0.01 | 0.01 | 0.01 | 0.01* |
|  | (0.01) | (0.01) | (0.01) | (0.01) |
| Long term unemployment | -1.17*** | -1.95*** | -1.48*** | -1.08*** |
|  | (0.29) | (0.37) | (0.22) | (0.28) |
| Lagged Not employed | -0.05 | 1.20** | 0.18 | 0.70* |
|  | (0.37) | (0.45) | (0.26) | (0.31) |
| Lagged Trainee | -0.42 | 0.16 | 0.58 | 1.38** |
|  | (0.44) | (0.51) | (0.37) | (0.46) |
| Lagged Self employed | 1.49*** | 1.81*** | 0.66+ | 1.09** |
|  | (0.34) | (0.38) | (0.35) | (0.40) |
| Lagged Blue collar medium skilled | 0.30 | -0.23 | 0.45 | -0.32 |
|  | (0.28) | (0.33) | (0.43) | (0.49) |
| Lagged Blue collar high skilled | 0.22 | 1.08* | 1.44 | -0.21 |
|  | (0.42) | (0.48) | (1.53) | (1.24) |
| Lagged White collar low skilled | -0.25 | 0.30 | 0.32 | 0.72* |
|  | (0.43) | (0.45) | (0.26) | (0.30) |
| Lagged White collar medium skilled | 0.57+ | 0.48 | 0.68** | 1.14*** |
|  | (0.29) | (0.33) | (0.24) | (0.29) |
| Lagged White collar high skilled | 0.73 | 0.67 | 1.45 | 3.19** |
|  | (0.50) | (0.59) | (0.93) | (1.22) |
| Lagged Low-, Medium-level civil servants | 0.10 | 1.70** | 1.52* | 1.44* |
|  | (0.51) | (0.61) | (0.64) | (0.71) |
| Lagged High-level civil servants | -0.14 | 0.02 | 0.13 | -0.01 |
|  | (0.43) | (0.48) | (0.41) | (0.48) |
| IHS permanent income | 0.28** | 0.11 | 0.03 | 0.10* |
|  | (0.09) | (0.07) | (0.03) | (0.04) |
| Married to widowed | 0.08 | 2.03 | 0.25 | -0.36 |
|  | (1.52) | (1.64) | (0.72) | (0.80) |
| Married to divorced/separated | -0.74+ | -0.95+ | -1.10** | 0.20 |
|  | (0.44) | (0.53) | (0.36) | (0.48) |
| Never Married to married | 0.23 | 0.59 | 0.29 | 1.03* |
|  | (0.42) | (0.47) | (0.38) | (0.44) |
| Always never married | -0.25 | -0.39 | 0.03 | -0.32 |
|  | (0.42) | (0.48) | (0.37) | (0.43) |
| Single to married | 0.33 | -0.85 | -0.47 | 0.33 |
|  | (0.47) | (0.53) | (0.42) | (0.47) |
| Single (other) | -0.55 | -0.24 | -0.16 | -0.40 |
|  | (0.36) | (0.42) | (0.31) | (0.35) |
| Number of marriages | -0.40* | -0.84*** | -0.02 | -0.59** |
|  | (0.20) | (0.22) | (0.16) | (0.18) |
| Length of marriage | -0.01 | 0.00 | -0.01 | -0.02 |
|  | (0.01) | (0.01) | (0.01) | (0.01) |
| Lagged risk preferences | -0.02 | -0.05 | 0.02 | -0.02 |
|  | (0.03) | (0.04) | (0.03) | (0.03) |
| HH Value inheritances/bestowal/lottery | -0.03 | 0.13+ | 0.09 | 0.01 |
|  | (0.06) | (0.08) | (0.06) | (0.07) |
| Fin. assets share | 0.57*** | 0.54*** | 0.53*** | 0.50*** |
|  | (0.09) | (0.10) | (0.06) | (0.07) |
| Lagged Worried for financial reasons | -0.54*** | -0.42** | -0.42*** | -0.53*** |
|  | (0.12) | (0.13) | (0.10) | (0.12) |
| Sell own property | -4.53*** | -4.91*** | -4.96*** | -5.27*** |
|  | (0.45) | (0.52) | (0.33) | (0.43) |
| Acquired own property | -1.03** | -0.55 | -0.85** | -0.70* |
|  | (0.33) | (0.40) | (0.30) | (0.35) |
| Always tenant | -4.78*** | -4.82*** | -5.70*** | -5.54*** |
|  | (0.27) | (0.29) | (0.24) | (0.26) |
| No more consumer credits | 6.29*** | 5.81*** | 7.87*** | 5.59*** |
|  | (0.32) | (0.33) | (0.34) | (0.34) |
| Acquire consumer credits | 2.24*** | 1.44*** | 2.73*** | 0.03 |
|  | (0.29) | (0.33) | (0.31) | (0.33) |
| No consumer credits | 6.40*** | 5.78*** | 7.81*** | 5.59*** |
|  | (0.25) | (0.26) | (0.27) | (0.27) |
| Lagged tangible assets | 0.41 | 0.76* | 0.37+ | 0.58+ |
|  | (0.25) | (0.36) | (0.22) | (0.31) |
| Lagged property debt | -0.05 | 0.14 | 0.08 | -0.16 |
|  | (0.26) | (0.28) | (0.23) | (0.26) |
| HH Sell stocks | -0.55* | -0.37 | -0.62** | -0.19 |
|  | (0.25) | (0.29) | (0.22) | (0.26) |
| HH Buy stocks | -0.21 | 0.17 | -0.21 | -0.37 |
|  | (0.28) | (0.35) | (0.25) | (0.32) |
| HH No stocks | -1.20*** | -0.77*** | -1.17*** | -1.09*** |
|  | (0.20) | (0.23) | (0.18) | (0.21) |
| HH Inheritances | 1.12+ | -0.90 | -0.28 | -0.02 |
|  | (0.65) | (0.77) | (0.60) | (0.68) |
| HH Lottery | 0.00 | -1.32 | -0.74 | -0.11 |
|  | (0.76) | (0.98) | (0.73) | (0.86) |
| HH Saving | 1.86*** | 2.52*** | 1.96*** | 2.46*** |
|  | (0.22) | (0.26) | (0.18) | (0.22) |
| Constant | -0.21 | 3.69+ | -0.70 | 0.69 |
|  | (2.06) | (2.17) | (1.59) | (1.96) |
| Adj. R2 | 0.45 | 0.46 | 0.50 | 0.48 |
| Observations | 5,240 | 3,813 | 5,824 | 4,388 |

Source: SOEPv30, individuals aged 25-64. Panel samples 2002–2007 and 2007–2012 are used.

Note: + p-value <0.10; * p-value < 0.05; ** p-value < 0.01; *** p-value < 0.001. Standard errors in parentheses.

Controlling for missing variables. Reference categories: German, lagged low educated, West Germany, lagged blue collar low skilled, always married, always own property, always consumer credits, HH hold stocks. HH stands for household.

**APPENDIX B**

**Control variables**

The control variables are described in the following section. Note that when we used the term “*lagged variable,*” we are referring to information from 5 years before (i.e., in 2007, the information from 2002 and in 2012 from 2007). We also define *changes* in marital status, own property status, consumer credits, and stocks, which are defined by comparing the status in year 1 (e.g. 2002, or 2007) to that in year 2 (2007 or 2012).

**Socio-demographic variables**: migration status (German – ref. group – or migrant background), age, age squared, number of children under 5 years old in the household, a dummy equal to 1 if living in East Germany.

**Lagged level of education**: low educated (ISCED 0, 1, 2), lower vocational (ISCED 3), upper vocational (ISCED 4, 5), university (ISCED 6); if the individual is still in education, the next completed level of education is imputed as lagged.

**Marital history**: number of marriages, length of current marriage.

**Employment history**: months spent in full-time employment in the previous 5 years, months spent in part-time employment in the previous 5 years, and a dummy for long-term unemployment, equal to 1 if the person spent 12 months or more in unemployment.

**Lagged occupational status**: categorical variables: not employed (=1 if inactive, unemployed), trainee (=1 if military, apprentice or trainee), self-employment, white collar low skilled (=1 if untrained and trained employee with simple tasks), white collar medium skilled (=1 if skilled employee, qualified professional), white collar high skilled (=1 if managers), blue collar low skilled (=1 if untrained, or semi-trained worker, ref. group), blue collar medium skilled (=1 if trained worker), blue collar high skilled (=1 if foreman) , low- and medium-level civil servants , high-level civil servants (high and executive).

**Permanent income:** (inverse hyperbolic sine transformation) of 5-years average of individual total income (individual labor earnings, unemployment benefits, old age or other pensions, subsistence allowance, maternity benefit, student grants, alimony, company or private pension).

**Lagged risk preferences**: self-defined, answering to the question “Are you generally a person who is fully prepared to take risks or do you try to avoid taking risks?”, and the possible answer are from 0 to 10. Since the preference for risk is not collected every year, we use information from 2004 for 2002, and from 2008 for 2007 (or 2006 if missing in 2008).

**HH Inheritance/bestowals; HH lottery:** takes on value 1 if the household had inheritances (/lottery) in the previous 5 years (for the previous 3 years in 2002).

**HH value of inheritances/bestowals/lottery**: amount of inheritances/bestowals/lotteryreceived in the previous 5 years (for the estimations, the inverse hyperbolic sine transformation is applied).

**HH savings**: is a dummy variable equal to 1 if the household was able to save regularly at least for one year in the previous 5.

**Financial assets share:** is constructed using the ratio among financial assets and non-financial assets, interacted by a dummy which takes value 1 if the household have stocks (because fin. assets can also be savings accounts).

**Lagged worried for financial reasons:** every year, individuals are asked to answer to the question “are you concerned with your own economic situation?” The variable, in our setup, takes value 1 if the person is not concerned at all, 2 if she is somewhat concerned, 3 if very concerned. Missing values are imputed with value 2.

**Changes in status:**

**Marital status**: the individual can be always married (ref. category), can become widowed from married, divorced or separated from married; she can be always never married, or got married if she was previously never married, or previously single (widowed/divorced/separated). She is considered “single (other)” if she remained widowed, divorced or separated, or if she had any change among there 3 categories, or from never married into separated.

**Property**: the individual can be always owner (ref. category), sell the property, acquire property, or be always tenant.

**Consumer credits**: the individual can have consumer credits in both periods (ref. category), get rid of them, take out consumer credits, or never have consumer credits.

**Stocks**: the household can have stocks in both periods (ref. category), selling them, acquire them, or never have stocks.

In addition, we also include some “*missing variables*”: the appropriate variable is imputed, and the “missing variable” takes value 1. “Missing employment” takes value 1 if the employment history or the occupational category was missing; “missing bequest” takes value 1 if the inheritance, gifts, lottery (or their value), saving variable is missing, “missing personal” takes 1 if variables for education, marital status or marital history, migration background, risk preference, are missing.

In the Firpo, Fortin, Lemieux decomposition, the explanatory variables are grouped in the following way:

**Migration**: migratory status;

**Age**: age and age squared;

**Kids**: number of children;

**Education**: lagged level of education;

**Residence**: residence in East Germany;

**Labor market participation**: labor market (full-time, part-time, unemployment, not employed);

**Occupation**: lagged occupational status (trainee, self-employed, white collar low skilled, white collar medium skilled, white collar high skilled, blue collar medium skilled, blue collar high skilled,, civil servants low/medium or high);

**Income**: personal permanent income;

**Marital status**: changes in marital status;

**Other marital variables**: number of marriages and length of current marriage;

**Risk preferences**: lagged risk preferences;

**HH value inherit./bestowal/lottery**: value of inheritances/bestowal/lottery;

**Financial assets share**: financial assets share;

**Worried**: lagged worried for financial reasons;

**Other (missing)**: missing variables.
